# Supplementary material
Source: ML conference proceedings conference paper supplement (https://openreview.net/forum?id=i2H2sEiq2T)
Supplement: supplementary_material [file attachment]

## A Technical Proofs

*Proof of Proposition 4.1.* . Using the chain rule, (1), and the definitions of  $\ell_x$ ,  $\phi_x$ ,  $\psi_x$ , and  $Z_x$ , it follows that for any  $\delta \in \mathcal{W}$  we have

$$\begin{aligned} D_{\bar{w}}h(x, \bar{w})[\delta] &= D(\ell_x \circ \phi_x)(\bar{w})[\delta] = D(\ell_x \circ \psi_x)(Z_x(\bar{w})) \circ DZ_x(\bar{w})[\delta] \\ &= \langle \nabla(\ell_x \circ \psi_x)(Z_x(\bar{w})), DZ_x(\bar{w})[\delta] \rangle = \langle g_x, \mathcal{A}_x \delta \rangle \\ &= \langle \mathcal{A}_x^* g_x, \delta \rangle. \end{aligned}$$

The conclusion follows immediately from (2) with  $\psi = h(x, \cdot)$  and  $w_0 = \bar{w}$ .  $\square$

## B Efficient Implementation of Algorithm 2

This appendix presents the technical details of efficiently implementing Algorithm 2.

### B.1 Computing Intermediate Quantities

We argue that in the setting of neural networks, Algorithm 2 can obtain the intermediate quantities

$$\zeta_i \equiv \zeta_{i,x}, \quad g_i \equiv g_{i,x}$$

in a **single** forward and backward (or backpropagation) pass of the given network. For ease of notation, let  $i \geq 1$  be fixed and denote

$$\Phi_i(\cdot) \equiv \phi_i(\cdot, \dots, \phi_1(w_1, x)), \quad \tilde{\Phi}_i(\cdot) \equiv \phi_i(w_i, \cdot), \quad Z_i(\cdot) \equiv Z_{x,i}(\cdot), \quad \psi_i(\cdot) = \psi_{x,i}(\cdot),$$

for every  $i = 1, \dots, k$  and  $x \in B$ .

We start with the claim about  $\zeta_i$ . As  $Z_i(\cdot)$  and  $\phi_i(\cdot, \cdot)$  are the only two functions in our setting that depend on  $w_i$ , it is straightforward to see that there exist functions  $\alpha_i(\cdot)$  and  $\beta_i(\cdot)$  such that

$$\Phi_i(w_i) = \alpha_i \circ Z_i(w_i), \quad Z_i(w_i) = \beta_i \circ \Phi_{i-1}(w_{i-1}), \quad (9)$$

which together yield the recursive expression

$$\Phi_i(w_i) = \alpha_i \circ \beta_i \circ \Phi_{i-1}(w_{i-1}) \equiv \tilde{\Phi}(\Phi_{i-1}(w_{i-1})). \quad (10)$$

Since a single forward pass obtains the values  $\{\Phi_i(w_i)\}_{i=1}^k$  in sequence, it follows from (9) and (10) that we also obtain  $\zeta_i = Z_i(w_i)$  as part of the forward pass.

To show the claim about  $g_i$ , we first notice that (9) and (10) imply

$$\psi_i(\cdot) = \alpha_k \circ \beta_k \circ \alpha_{k-1} \circ \beta_{k-1} \circ \dots \circ \alpha_i(\cdot)$$

and, hence, the derivative of  $\psi_i(\cdot)$  only depends on the derivatives of  $\{\alpha_j\}_{j=i}^k$  and  $\{\beta_j\}_{j=i+1}^k$ . Since a single backpropagation step (i) obtains the derivatives (or their adjoints) of  $\ell_x$ ,  $\alpha_i$ , and  $\beta_i$  in the reverse order of  $i = k, \dots, 1$  and (ii) efficiently computes their sequential compositions, e.g.,

$$D(\ell_k \circ \alpha_k \circ \beta_k \circ \dots \circ \alpha_i)(\cdot)(\cdot),$$

it follows that the adjoint operators  $[D(\ell_x \circ \psi_i)(\cdot)]^*(\cdot)$  are also obtained from a single backpropagation step. Assuming that  $\zeta_i = Z_i(w_i)$  was already obtained in the first for-loop of Algorithm 2, we also obtain from these operators the gradients  $g_i = \nabla(\ell_x \circ \psi_i)(\zeta_i)$ .

In the next section, we give some examples of layers where the representations of the functions  $\Omega_i$  can also be obtained simultaneously with the outputs  $\zeta_i$ .

### B.2 Computing Batch Gradients

Suppose that (5) holds for every  $x \in B$  and  $i = 1, \dots, k$ , and define

$$S_i(B) := \sum_{x \in B} \ell_x \circ \psi_{i,x}(\zeta_{i,x}), \quad \hat{g}_{i,x} := \nabla_{\zeta_{i,x}} S_i(B)$$

Let us now show that  $g_{i,x} = \hat{g}_{i,x}$ . First, observe that if  $x, x' \in B$  and  $x \neq x'$  then neither  $\ell_x(\cdot)$  nor  $\psi_{i,x}(\cdot)$  depend on the value of  $\zeta_{i,x'}$  (and *vice versa*) for any  $i = 1, \dots, k$ . Consequently,

$$\begin{aligned} \hat{g}_{i,x} &= \nabla_{\zeta_{i,x}} S_i(B) = \nabla_{\zeta_{i,x}} (\ell_x \circ \psi_{i,x})(\zeta_{i,x}) + \underbrace{\sum_{x' \neq x} \nabla_{\zeta_{i,x}} (\ell_x \circ \psi_{i,x})(\zeta_{i,x})}_{=0} \\ &= \nabla_{\zeta_{i,x}} (\ell_x \circ \psi_{i,x})(\zeta_{i,x}) = g_{i,x}. \end{aligned}$$

Note that since each  $\zeta_{i,x}$  is computed in a single forward pass of a batch  $B$  (see Appendix B.1), the quantities  $\hat{g}_{i,x}$ , which are gradients taken with respect to  $\zeta_{i,x}$ , are obtained in a single (batched) backward pass.

## C Additional Algorithms

Algorithm 3 gives a subroutine for computing the necessary scalars used in the efficient squared norm function of the embedding layer.

---

### Algorithm 3 Computing the Nonzero Values of $n_k(x)$

---

**Input:**  $\pi(x) = [\pi_1(x), \dots, \pi_q(x)]$   
 Create an empty binary search tree  $T$ , where  $T[k]$  denotes the value at key  $k$   
**for**  $i = 1, \dots, q$  **do**  
   If  $\pi_i(x)$  is not in  $T$ , set  $T[\pi_i(x)] = 1$ .  
   Otherwise, set  $T[\pi_i(x)] = T[\pi_i(x)] + 1$   
**end for**  
 For every key  $k$  in  $T$ , set  $n_k(x) = T[k]$ .  
 Return the nonzero values of  $n_k(x)$ .

---

## D Decomposition Proofs

This appendix gives the derivation of the squared-normed functions  $\Omega_x(\cdot)$  found in the main body of the paper.

### D.1 Fully-Connected Layer

Since  $Z_x(\cdot)$  is linear, the adjoint operator of  $DZ_x(V, b)(\cdot)$  is clearly given by

$$[DZ_x(V, b)]^*(g) = \begin{bmatrix} U_x^* \\ \mathcal{Q}^* \end{bmatrix} g$$

and, hence, that  $\Omega_x(g) = \|U_x^* g\|^2 + \|\mathcal{Q}^* g\|^2$ . It now follows from the definition of the adjoint that

$$\|U_x^* g\|^2 = \langle U_x^* g, U_x^* g \rangle = \langle U_x U_x^* g, g \rangle = \langle U_x U_x^*, g g^* \rangle$$

which then implies

$$\Omega_x(g) = \langle U_x U_x^*, g g^* \rangle + \|\mathcal{Q}^* g\|^2.$$

### D.2 Embedding Layer

Since  $Z_x(\cdot)$  is linear, the adjoint operator of  $DZ_x(W)(\cdot)$  is clearly given by

$$[DZ_x(W)]^*(g) = Y_{\pi(x)}^* g$$

and, hence, that  $\Omega_i(g) = \|Y_{\pi(x)}^* g\|^2$ . Now, denote  $Y_\pi = Y_{\pi(x)}$ ,  $\pi = \pi(x)$ , and  $\text{Row}_k(M)$  to be the  $k$ -th row of a matrix  $M$ . Recall that

$$Y_\pi W = \begin{bmatrix} \text{Row}_{\pi_1}(W) \\ \vdots \\ \text{Row}_{\pi_q}(W) \end{bmatrix}.$$

Hence, for every  $g \in \mathbb{R}^{q \times d}$  and  $W \in \mathbb{R}^{r \times d}$ , we have

$$\langle Y_\pi W, g \rangle = \sum_{i=1}^q \langle \text{Row}_{\pi_i}(W), \text{Row}_i(g) \rangle = \sum_{j=1}^r \langle \text{Row}_j(W), \nu_j(g) \rangle = \langle W, Y_\pi^* g \rangle$$

where

$$\text{Row}_j(Y_\pi^* g) = \nu_j(g) = \sum_{i:\pi_i=j} \text{Row}_i(g).$$

Using the fact that  $\text{Row}_{i_1}(g) = \text{Row}_{i_2}(g)$  for any  $i_1$  and  $i_2$  satisfying  $\pi_{i_1} = \pi_{i_2} = j$ , we have that

$$\text{Row}_j(Y_\pi^* g) = \sum_{i:\pi_i=j} \text{Row}_i(g) = n_j(x) \tilde{g}_j$$

which clearly implies  $\Omega_x(g) = \|Y_\pi^* g\|^2 = \sum_{j=1}^r n_j(x) \tilde{g}_j^2$ .

### D.3 Low Rank Approximation Layer

Since  $Z_x(\cdot)$  is quadratic,  $Z_x(\cdot)$  is Fréchet differentiable and, hence, Gateaux differentiable. Consequently, the derivative  $DZ_x(V)(\cdot)$  is given by the Gateaux differential

$$\begin{aligned} DZ_x(V)[\Delta] &= \lim_{t \downarrow 0} \frac{Z_x(V + t\Delta) - Z_x(V)}{t} \\ &= \lim_{t \downarrow 0} \frac{\langle U_x, (V + t\Delta)(V + t\Delta)^* - VV^* \rangle}{2t} \\ &= \frac{1}{2} \langle U_x, \Delta V^* + V \Delta^* \rangle + \lim_{t \downarrow 0} \frac{t}{2} \langle U_x, \Delta \Delta^* \rangle \\ &= \frac{1}{2} \langle U_x, \Delta V^* + V \Delta^* \rangle. \end{aligned}$$

Re-arranging terms, we have that

$$DZ_x(V)[\Delta] = \frac{1}{2} \langle U_x, \Delta V^* + V \Delta^* \rangle = \frac{1}{2} \langle (U_x + U_x^*)V, \Delta \rangle$$

and, hence, that  $[DZ_x(V)]^*(g) = g(U_x V^* + V U_x^*)/2$  for every  $g \in \mathbb{R}$ . Consequently, we have that

$$\Omega_x(g) = \|[DZ_x(V)]^*(g)\|^2 = \frac{g^2}{4} \|(U_x + U_x^*)V\|^2.$$

## E Additional Squared-Norm Functions

This appendix discusses decompositions of more complicated layer functions.

### E.1 Multi-Head Attention

Define the auxiliary functions  $\text{Softmax} : \mathbb{R}^n \mapsto \mathbb{R}^n$  and

$$\mathcal{T} : \mathbb{R}^{d_1 \times n} \times \mathbb{R}^{d_2 \times n} \times \mathbb{R}^{d_3 \times n} \times \mathbb{R}^{d_3 \times n} \mapsto \mathbb{R}^{d_3 \times n}$$

as given by

$$\begin{aligned} [\text{Softmax}(x)]_j &= \frac{\exp(x_j)}{\sum_{i=1}^n \exp(x_i)}, \\ \mathcal{T}(Q, K, V, M) &= V \left[ \text{Softmax} \left( \frac{K^T Q}{\sqrt{d_1}} \right) \bullet M^T \right] \in \mathbb{R}^{d_3 \times n}, \end{aligned}$$

where  $\mathbf{1}$  is a vector of all ones and  $A \bullet B$  denotes the Hadamard product between  $A$  and  $B$ .

Given variables  $\{W_i^Q\}_{i=1}^h \subseteq \mathbb{R}^{d_m \times d_q}$ ,  $\{W_i^K\}_{i=1}^h \subseteq \mathbb{R}^{d_m \times d_q}$ ,  $\{W_i^V\}_{i=1}^h \subseteq \mathbb{R}^{d_m \times d_v}$ , and  $\{W_i^O\}_{i=1}^h \subseteq \mathbb{R}^{d_m \times d_v}$ , input queries  $Q_x \in \mathbb{R}^{d_q \times n}$ , input keys  $K_x \in \mathbb{R}^{d_q \times n}$ , input values  $V_x \in \mathbb{R}^{d_v \times n}$ , and mask  $M_x \in \mathbb{R}^{d_v \times n}$ , the multi-head attention layer function  $\phi_x(\cdot)$  is given by

$$\phi_x(W) = \sum_{i=1}^h W_i^O \mathcal{T}_i(x),$$

$$\mathcal{T}_i(x) := \mathcal{T}(W_i^Q Q_x, W_i^K K_x, W_i^V V_x, M_x) \in \mathbb{R}^{d_v \times n}$$

where  $W = (W_1, \dots, W_h)$  and  $W_i := (W_i^Q, W_i^K, W_i^V, W_i^O)$ .

We now consider the squared-norm function

$$\Omega_x : \mathbb{R}^{hd_m \times n} \times \mathbb{R}^{hd_m \times n} \times \mathbb{R}^{hd_m \times n} \times \mathbb{R}^{hd_m \times n} \mapsto \mathbb{R}$$

generated by the choice of

$$Z_x(W_1, \dots, W_h) = \begin{bmatrix} Z_x^Q(W_1^Q, \dots, W_h^Q) \\ Z_x^K(W_1^K, \dots, W_h^K) \\ Z_x^V(W_1^V, \dots, W_h^V) \\ Z_x^O(W_1^O, \dots, W_h^O) \end{bmatrix},$$

given by

$$\begin{aligned} [Z_x^Q(W_1^Q, \dots, W_h^Q)]_j &= Z_{x,j}^Q := W_j^Q Q_x, \\ [Z_x^K(W_1^K, \dots, W_h^K)]_j &= Z_{x,j}^K := W_j^K K_x, \\ [Z_x^V(W_1^V, \dots, W_h^V)]_j &= Z_{x,j}^V := W_j^V V_x, \\ [Z_x^O(W_1^O, \dots, W_h^O)]_j &= Z_{x,j}^O := W_j^O \mathcal{T}_j(x), \end{aligned}$$

for  $j = 1, \dots, h$ . Since each of the block functions that define  $Z_x(\cdot)$  are linear, we can apply the same analysis as in the fully connected setting to obtain

$$\begin{aligned} \|[DZ_{x,j}^B]^*(g_j)\|^2 &= \langle BB^*, g_j g_j^* \rangle \quad \forall B \in \{Q_x, K_x, V_x\}, \\ \|[DZ_{x,j}^O]^*(g_j)\|^2 &= \langle \mathcal{T}_j(x) [\mathcal{T}_j(x)]^*, g_j g_j^* \rangle. \end{aligned}$$

Hence, for appropriately sized gradients  $g = (g_1, \dots, g_h)$  where  $(g_j^{Q_x}, g_j^{K_x}, g_j^{V_x}, g_j^O)$ , one has that

$$\Omega_x(g) = \sum_{j=1}^h \left[ \langle \mathcal{T}_j(x) [\mathcal{T}_j(x)]^*, (g_j^O)(g_j^O)^* \rangle + \sum_{B \in \{Q_x, K_x, V_x\}} \langle BB^*, (g_j^B)(g_j^B)^* \rangle \right],$$

and a representation of  $\Omega_x$  may be obtained through the matrices  $Q_x Q_x^*$ ,  $K_x K_x^*$ ,  $V_x V_x^*$ , and  $\{\mathcal{T}_j(x) [\mathcal{T}_j(x)]^*\}_{j=1}^h$ , which only consumes  $\Theta(d_q^2 + h d_v^2)$  additional storage for a batch  $B$ .

Notice that this is exceedingly more efficient than the naive approach of materializing each  $\nabla_W h(x, W)$  for  $x \in B$ , which consumes  $\Theta(|B|(d_m d_q + d_m d_v))$  additional storage. Moreover, the classic ghost clipping technique does not immediately apply to  $\phi_x(W)$  as there is not a simple transform from  $\phi_x(W)$  to some linear function of  $W$ .

## E.2 Layer Normalization

Given scaling variables  $\gamma \in \mathbb{R}^c$ , offset variables  $\beta \in \mathbb{R}^c$ , tolerance  $\varepsilon > 0$ , input  $u_x \in \mathbb{R}^d$  where  $c|d$ , and a linear broadcasting operator  $\mathcal{Q} : \mathbb{R}^c \mapsto \mathbb{R}^d$ , the layer normalization layer function  $\phi_x(\cdot)$  is given by

$$\phi_x(\gamma, \beta) = (\mathcal{Q}\gamma) \bullet \left[ \frac{u_x - \text{Mean}(u_x)}{\sqrt{\text{Var}(u_x) + \varepsilon}} \right] + \mathcal{Q}\beta,$$

where  $A \bullet B$  denotes the Hadamard product between  $A$  and  $B$  and  $\text{Mean}(u_x)$  (resp.  $\text{Var}(u_x)$ ) is a vector in  $\mathbb{R}^d$  (resp. scalar in  $\mathbb{R}$ ) whose entries are the mean (resp. variance) of the entries in  $u_x$ .

We now consider the squared-norm function  $\Omega_x : \mathbb{R}^c \times \mathbb{R}^c \mapsto \mathbb{R}$  generated by the choice of  $Z_x(\gamma, \beta) = (\gamma, \beta)$ , i.e.,  $Z_x(\cdot)$  is the identity function. Immediately, one has that  $\Omega_x(g) = \|g\|^2$ , which incurs a compute (resp. storage) cost of  $\Theta(|B|c)$  (resp.  $\Theta(1)$ ).

More interestingly, when  $2c \ll d$ , this approach is strictly better than both the naive approach *and* the ghost clipping technique when applied with  $Z_x(\gamma, \beta) = \phi_x(\gamma, \beta)$ . In the former case, it is straightforward to see that we incur a compute (resp. storage) cost of  $\Theta(|B|c)$  (resp.  $\Theta(|B|c)$ ). To analyze the latter case, let  $D_x \in \mathbb{R}^{d \times d}$  be a diagonal matrix given by

$$[D_x]_{ii} = \left[ \frac{u_x - \text{Mean}(u_x)}{\sqrt{\text{Var}(u_x) + \varepsilon}} \right]_i \quad i = 1, \dots, d,$$

and observe that

$$\phi_x(\gamma, \beta) = \underbrace{\begin{bmatrix} D_x Q & Q \end{bmatrix}}_{=: U_x} \begin{bmatrix} \gamma \\ \beta \end{bmatrix}.$$

Consequently, the classic ghost clipping technique yields the decomposition

$$\Omega_x(g) = \langle U_x U_x^*, gg^* \rangle = \langle D_x Q Q^* D_x + Q Q^*, gg^* \rangle$$

for  $g \in \mathbb{R}^d$ , which incurs a steep compute (resp. storage) cost of  $\Theta(d^2c + d^2|B|)$  (resp.  $\Theta(d^2)$ ) for general  $Q$  and  $2c \ll d$ .

## F Additional Experiments

### F.1 Effect of Batch Size on Fully-Connected Layers

Figure 4 presents numerical results for the same set of experiments as in Subsection 5.1 but for different batch sizes  $|B|$  instead of the output dimension  $q$ .

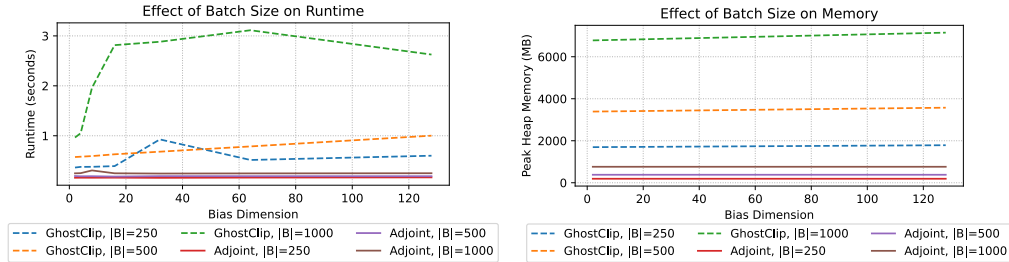

Figure 4: Runtime and memory cost graphs for fully-connected layer computations with bias dimensions  $m = \{2^1, 2^2, \dots, 2^{11}\}$  and batch sizes  $|B| = 250, 500, 1000$ .

Similar to Subsection 5.1, the results in Figure 4 are more favorable towards Adjoint compared to GhostClip.
